# Supplementary material for: WITHDRAWN: Cytotoxic effects of polystyrene nanoplastics in different functional sizes on MDA-MB-231 breast cancer cells and HFF-2 cells
Source: Research Square preprint supplement (doi:10.21203/rs.3.rs-2476090/v1), 2023-01-18

Table . Comparison of cell cycle phases in MDA-MB-231 and HFF-2 cells treated with PS-NH2 with the control group after 48 hours (P<0.001).


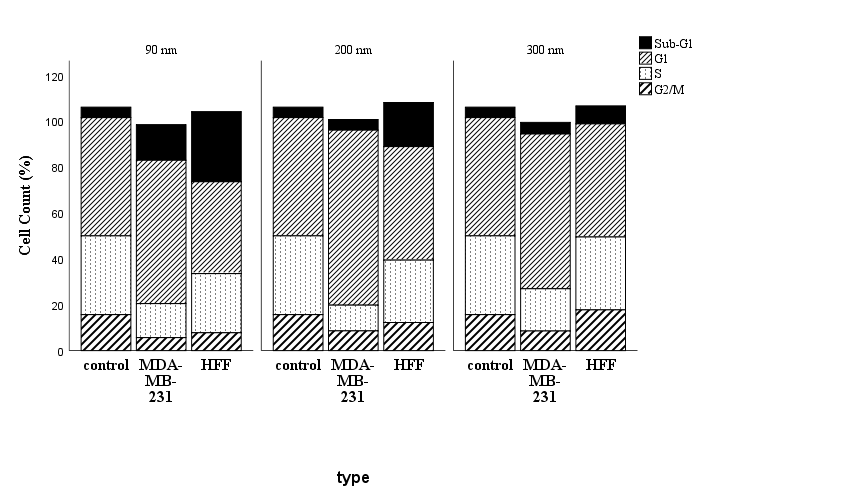

Supplement: Supplementary file 1 [file 1ba127c27dd451cfb2b56e16.docx]
